# Supplementary material for: The Benefits of Radical Treatments with Synchronous Splenectomy for Patients with Hepatocellular Carcinoma and Portal Hypertension
Source: MDPI journal article supplement (doi:10.3390/cancers14133155), 2022-06-28
Supplement: s1 [file s1]

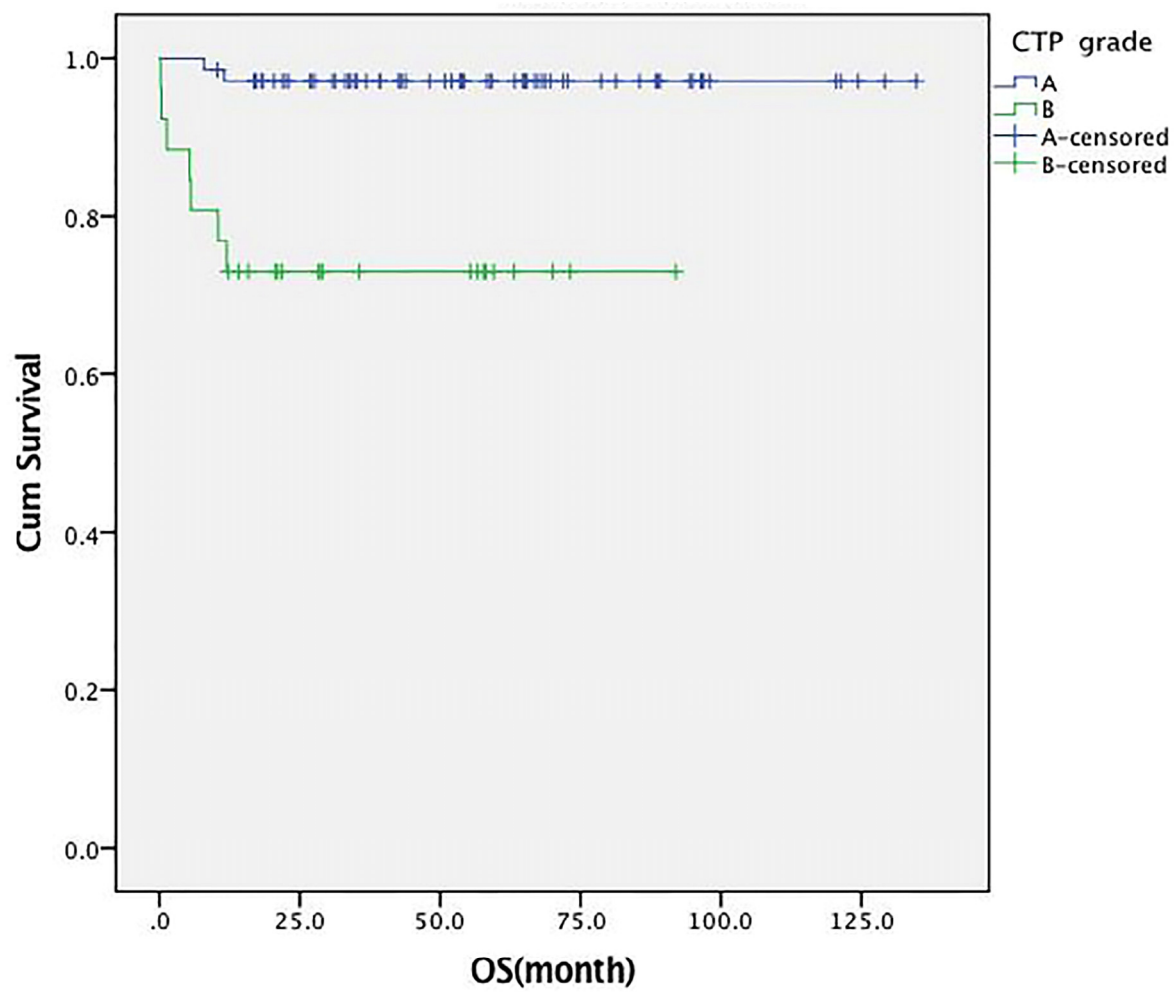

Figure S1: Different CTP grade at 1-year OS in the HS group ( $p = 0.000$ ).

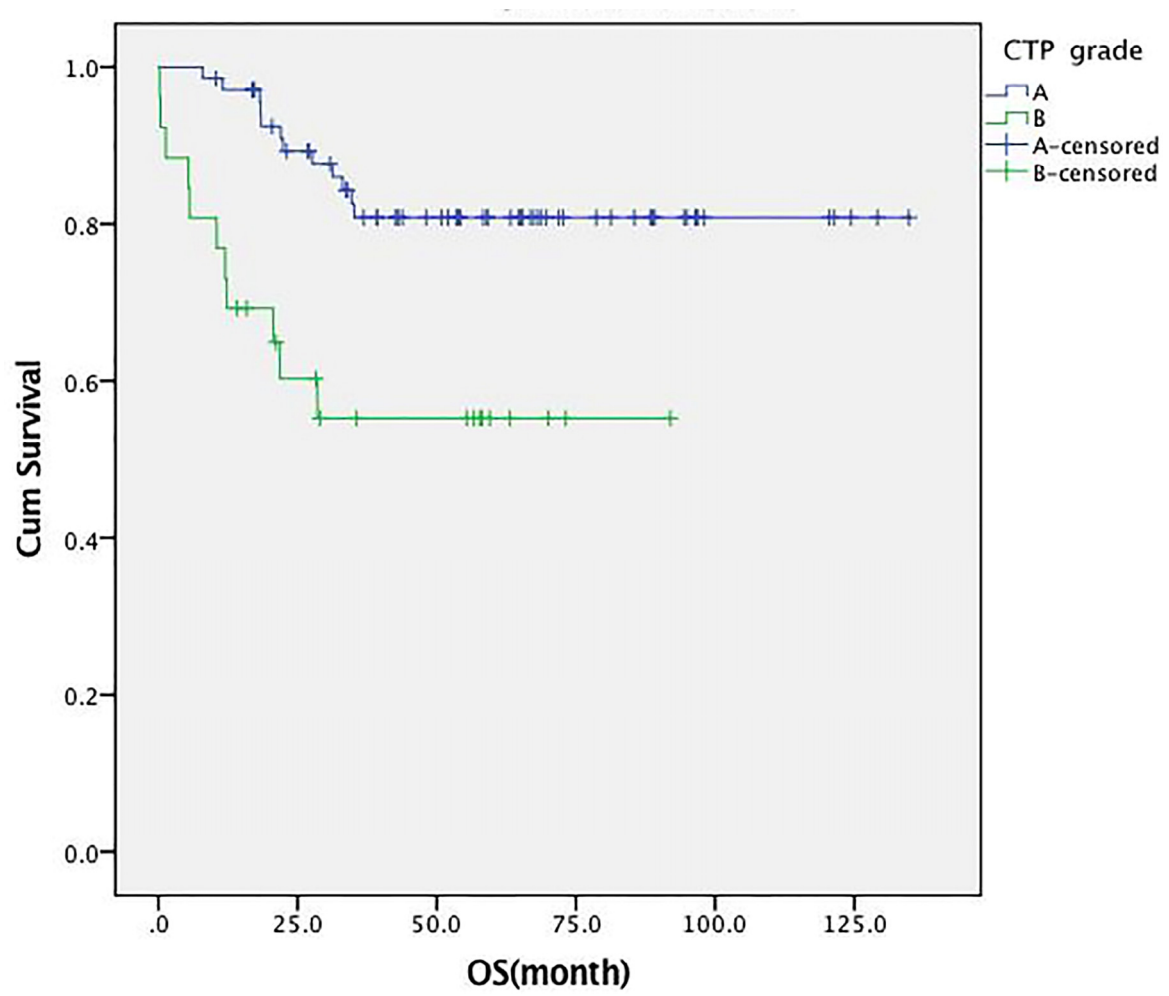

Figure S2: Different CTP grade at 3-year OS in the HS group ( $p = 0.002$ ).

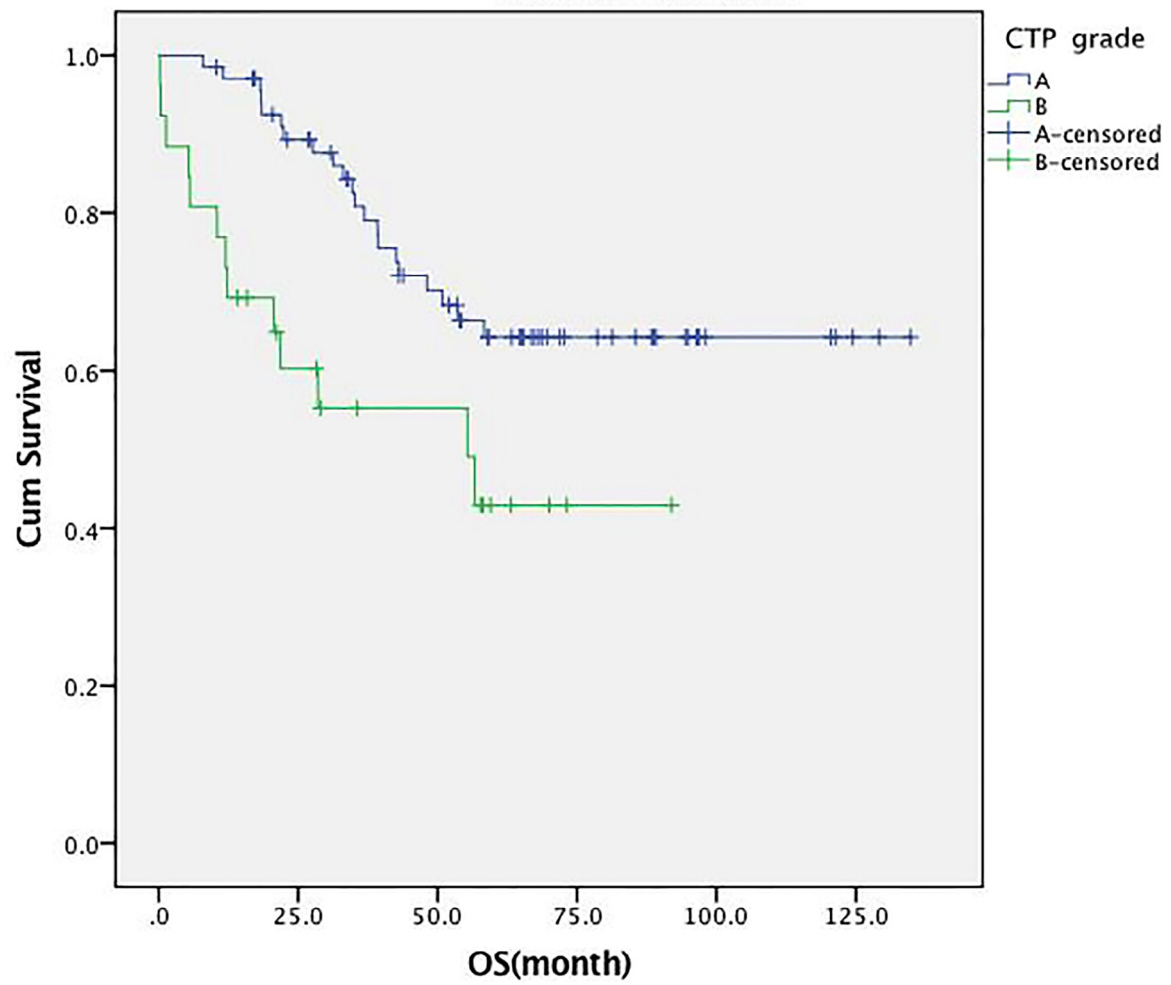

Figure S3: Different CTP grade at 5-year OS in the HS group ( $p = 0.009$ ).

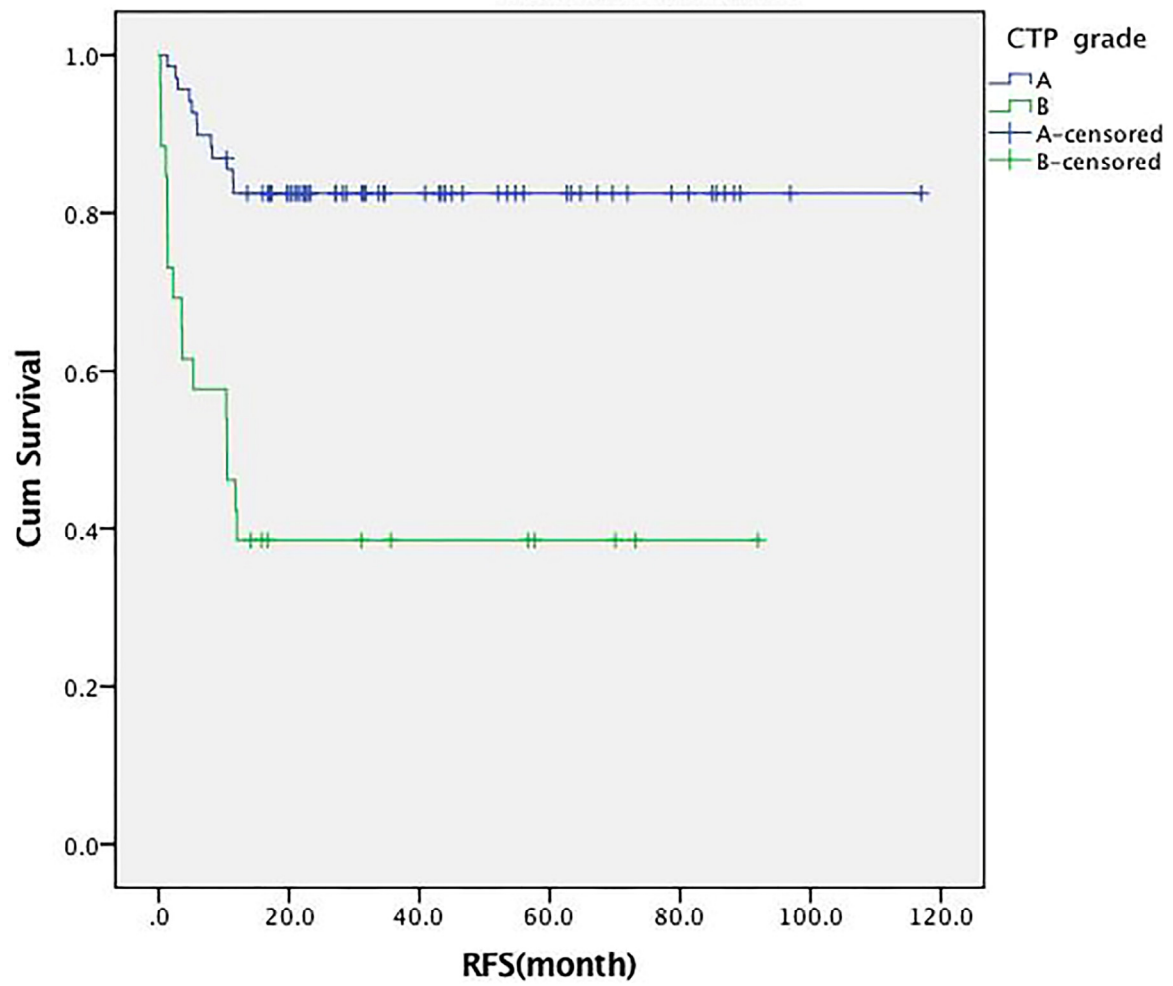

Figure S4: Different CTP grade at 1-year RFS in the HS group ( $p = 0.000$ ).

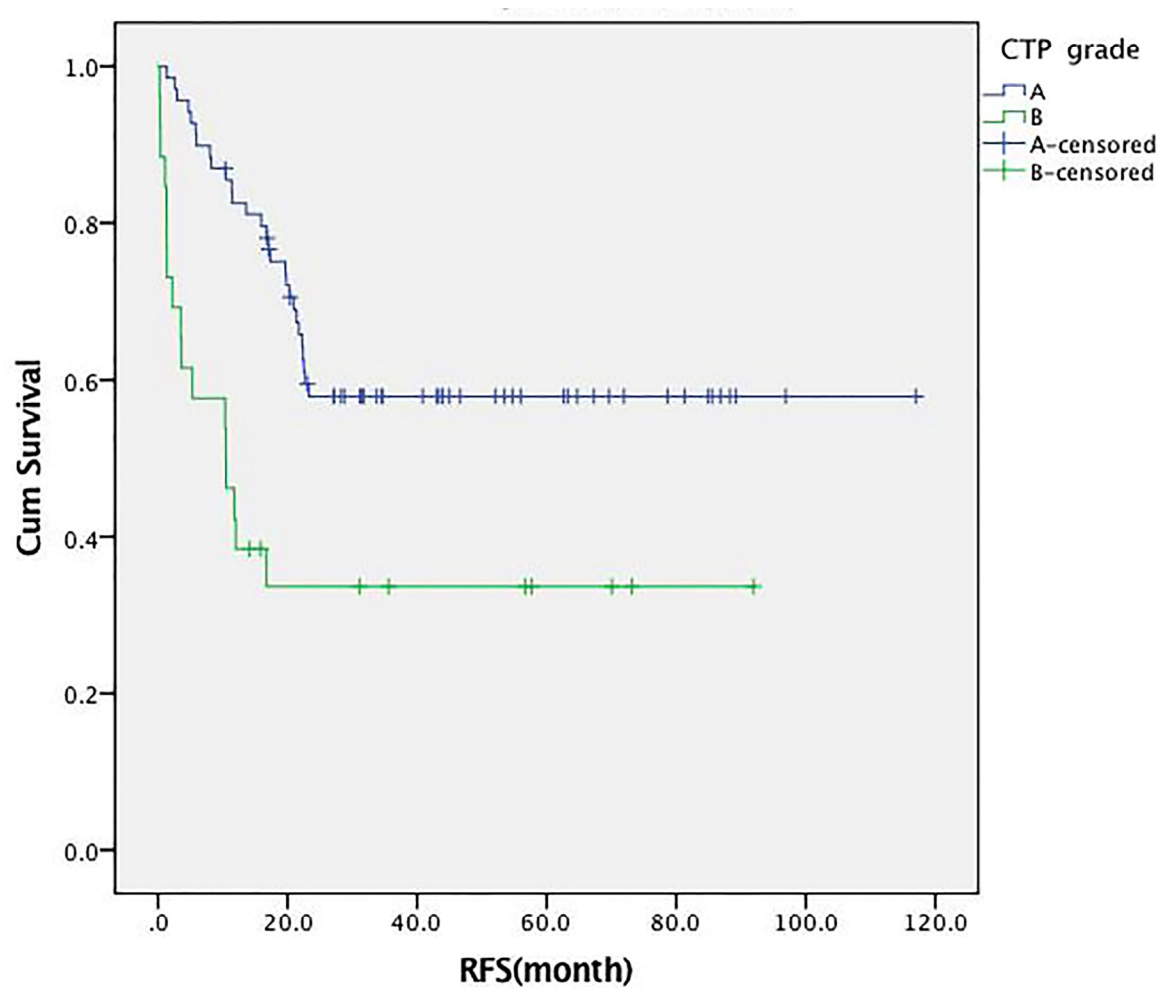

Figure S5: Different CTP grade at 2-year RFS in the HS group ( $p = 0.001$ ).

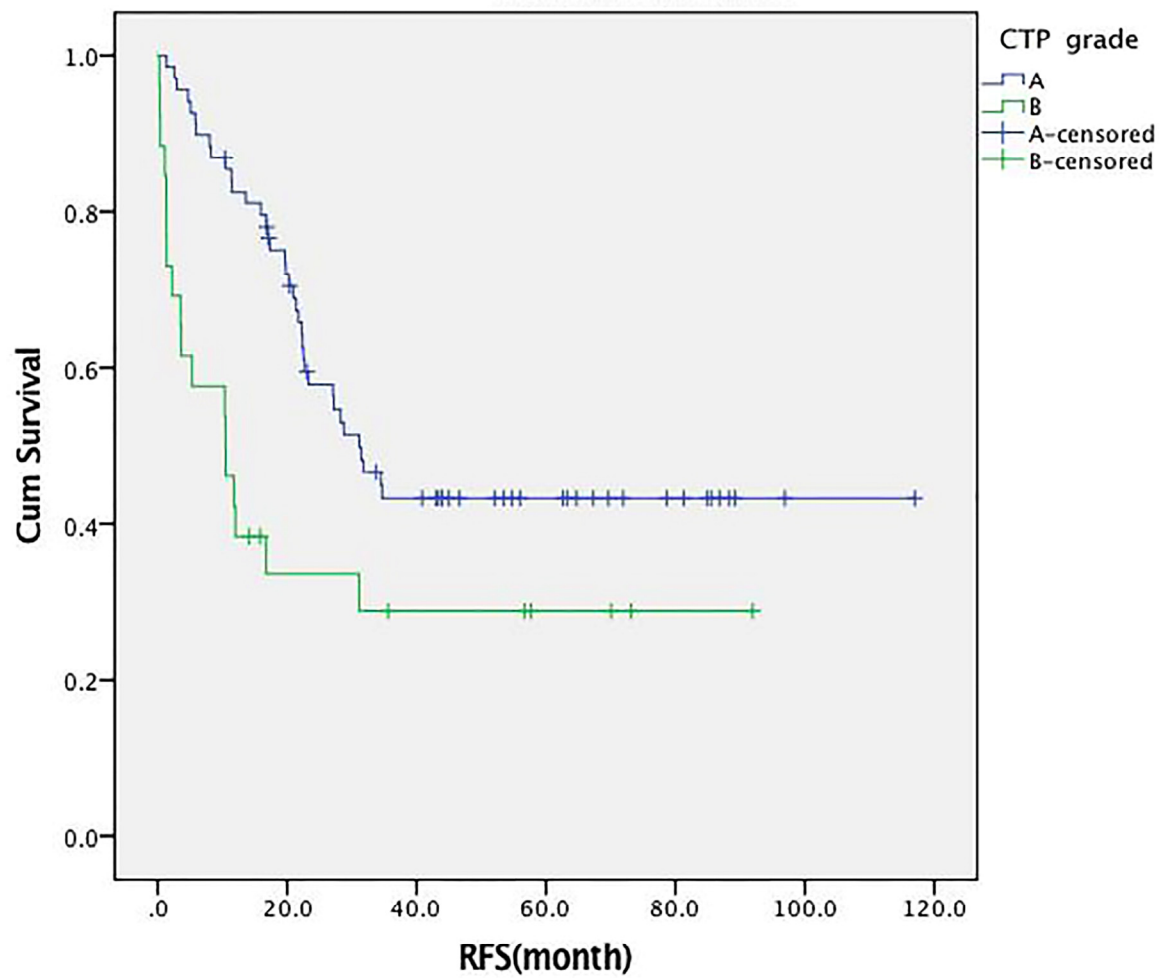

Figure S6: Different CTP grade at 3-year RFS in the HS group ( $p = 0.004$ ).

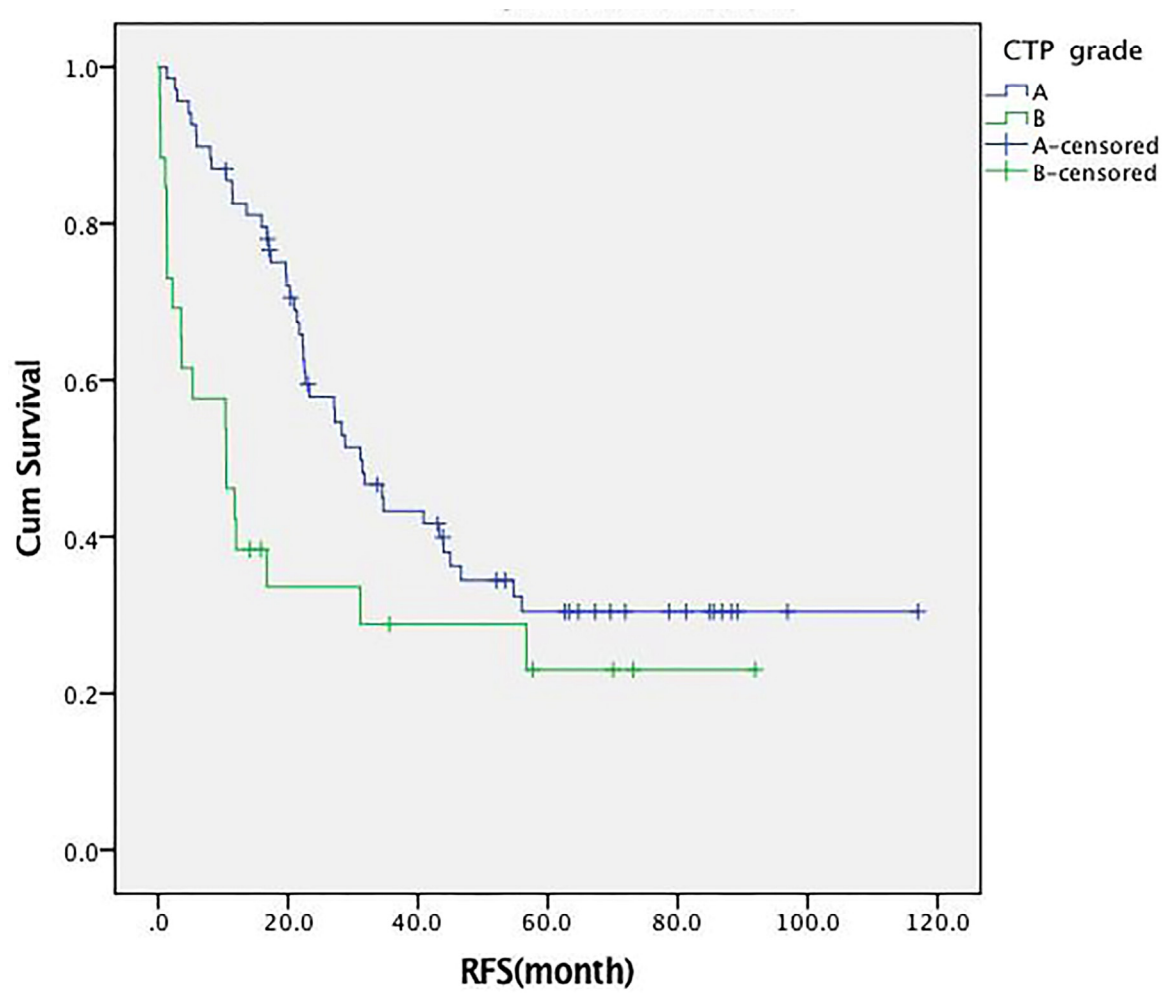

Figure S7: Different CTP grade at 5-year RFS in the HS group ( $p = 0.014$ ).
